# Supplementary material for: Splicing Machinery is Dysregulated in Pituitary Neuroendocrine Tumors and is Associated with Aggressiveness Features
Source: PubMed Central journal article supplement (PMC6826715; doi:10.3390/cancers11101439), 2019-09-26
Supplement: cancers-11-01439-s001.pdf [file cancers-11-01439-s001.pdf]

# Supplemental Material

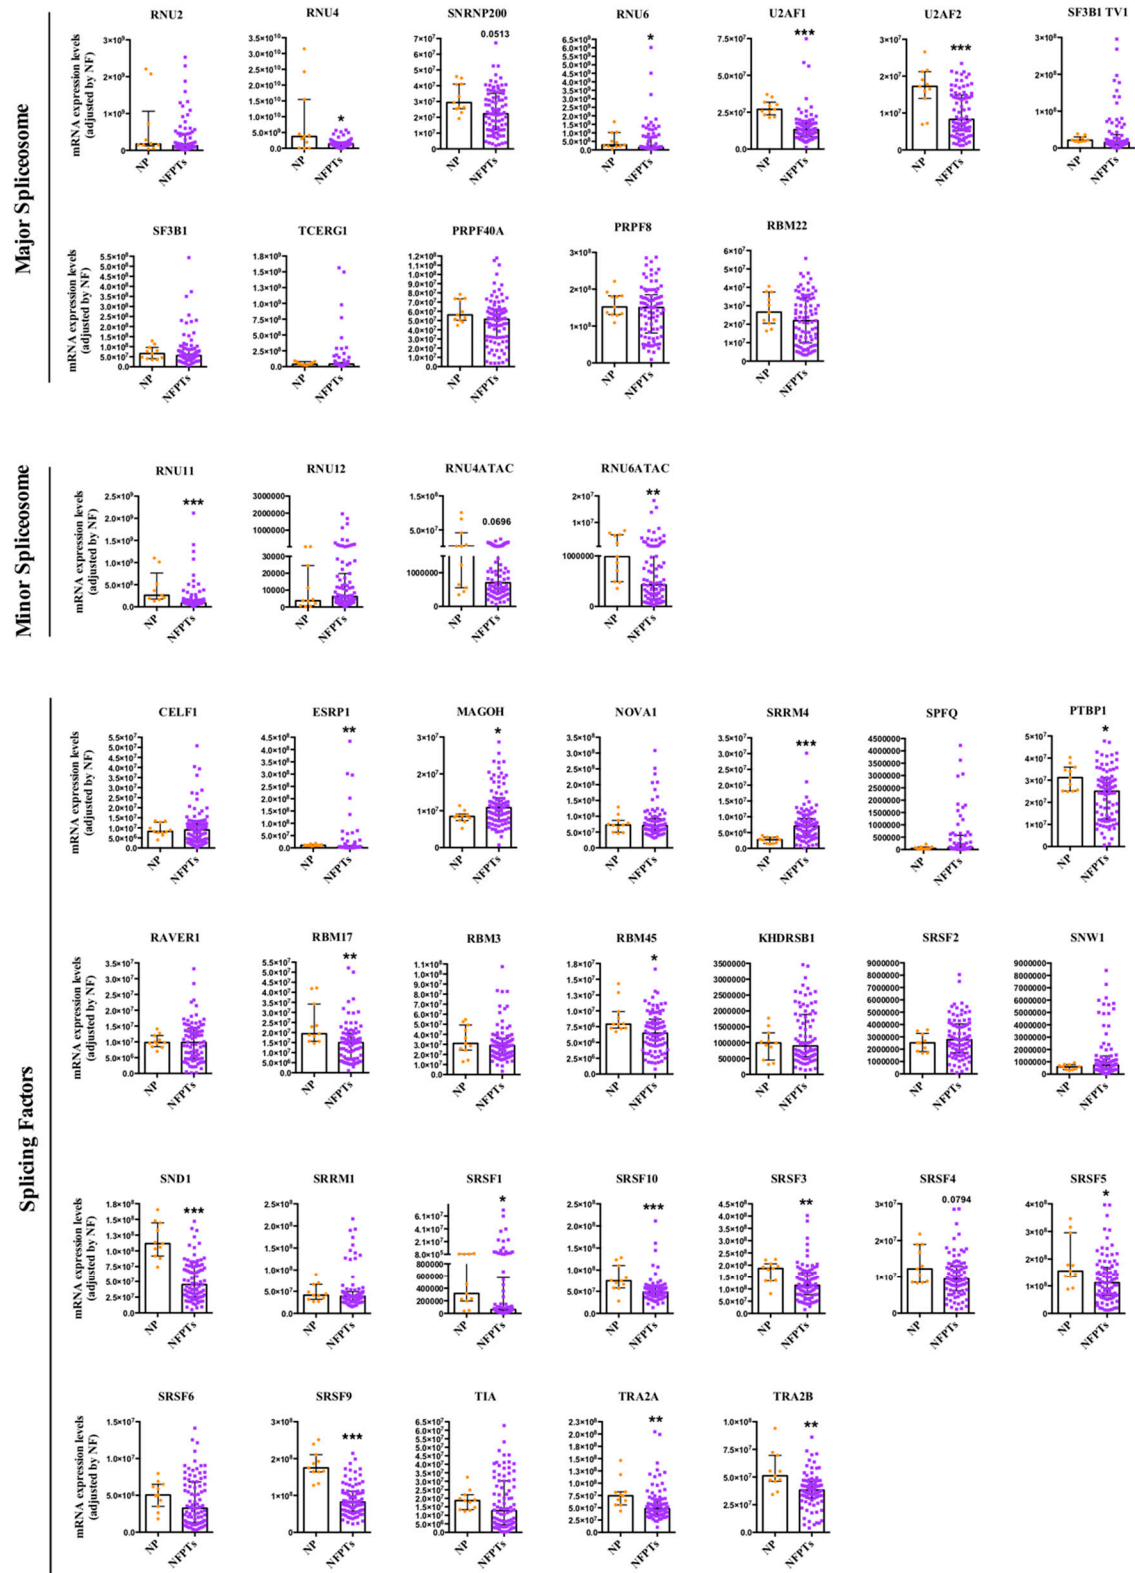

**Figure S1.** Non-functioning pituitary tumors (NPFTs). mRNA expression levels of all spliceosome components and splicing factors measured in NPFTs compared to NPs using the qPCR array. Data represent median  $\pm$  interquartile range of absolute expression levels (copy number) of each transcript adjusted by a normalization factor. Asterisks (\*  $p < 0.05$ , \*\*  $p < 0.01$ , \*\*\*  $p < 0.001$ ) indicate statistically significant differences between groups.

**A**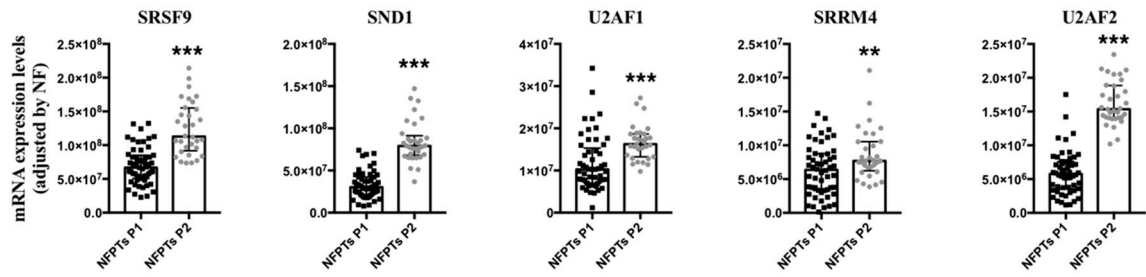**B**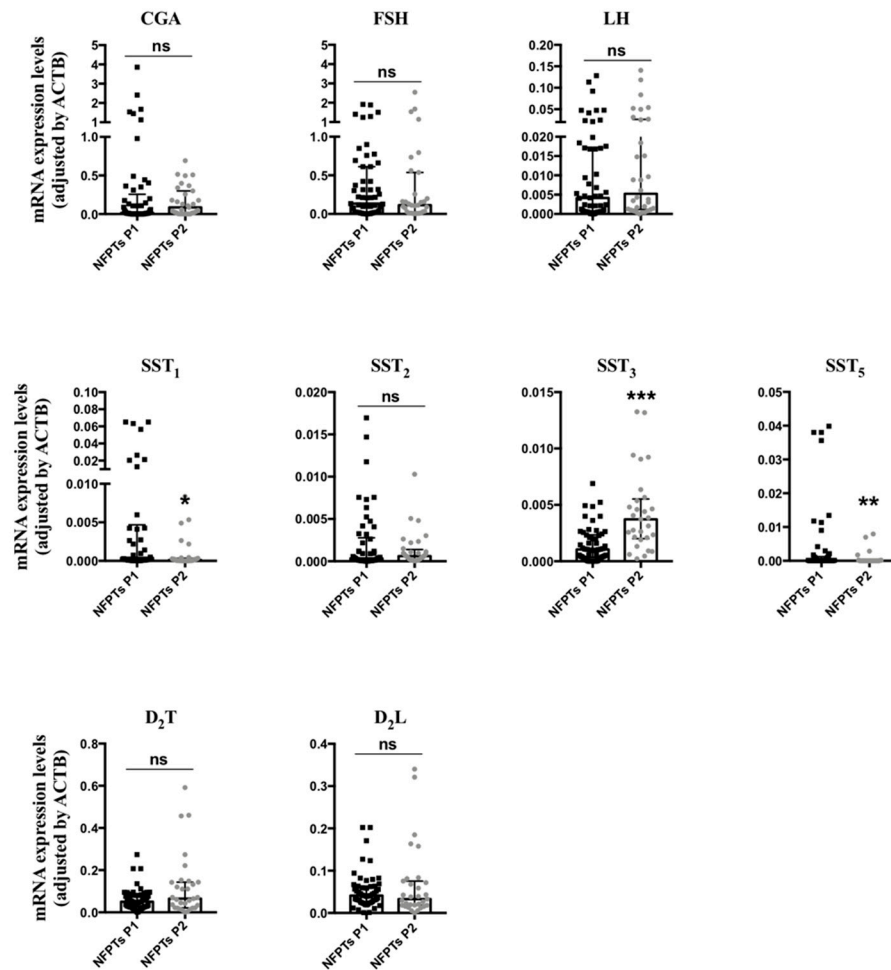

**Figure S2.** Non-functioning pituitary tumors (NFPTs). **(A)** mRNA expression levels of SRSF9, SND1, U2AF1, SRRM4 and U2AF2 in the two population of NFPTs (P1 and P2) observed in the heatmap. Data represent median  $\pm$  interquartile range of absolute expression levels (copy number) of each transcript measured by qPCR and adjusted by a normalization factor. **(B)** mRNA expression levels of classical hormones (CGA, FSH and LH) and somatostatin and dopamine receptors (SST<sub>1-5</sub> and D<sub>2</sub>) in the two population of NFPTs observed in the heatmap. Data represent median  $\pm$  interquartile range of absolute expression levels (copy number) of each transcript measured by qPCR and adjusted by  $\beta$ -actin (ACTB). Asterisks (\*  $p < 0.05$ , \*\*  $p < 0.01$ , \*\*\*  $p < 0.001$ ) indicate statistically significant differences between groups.

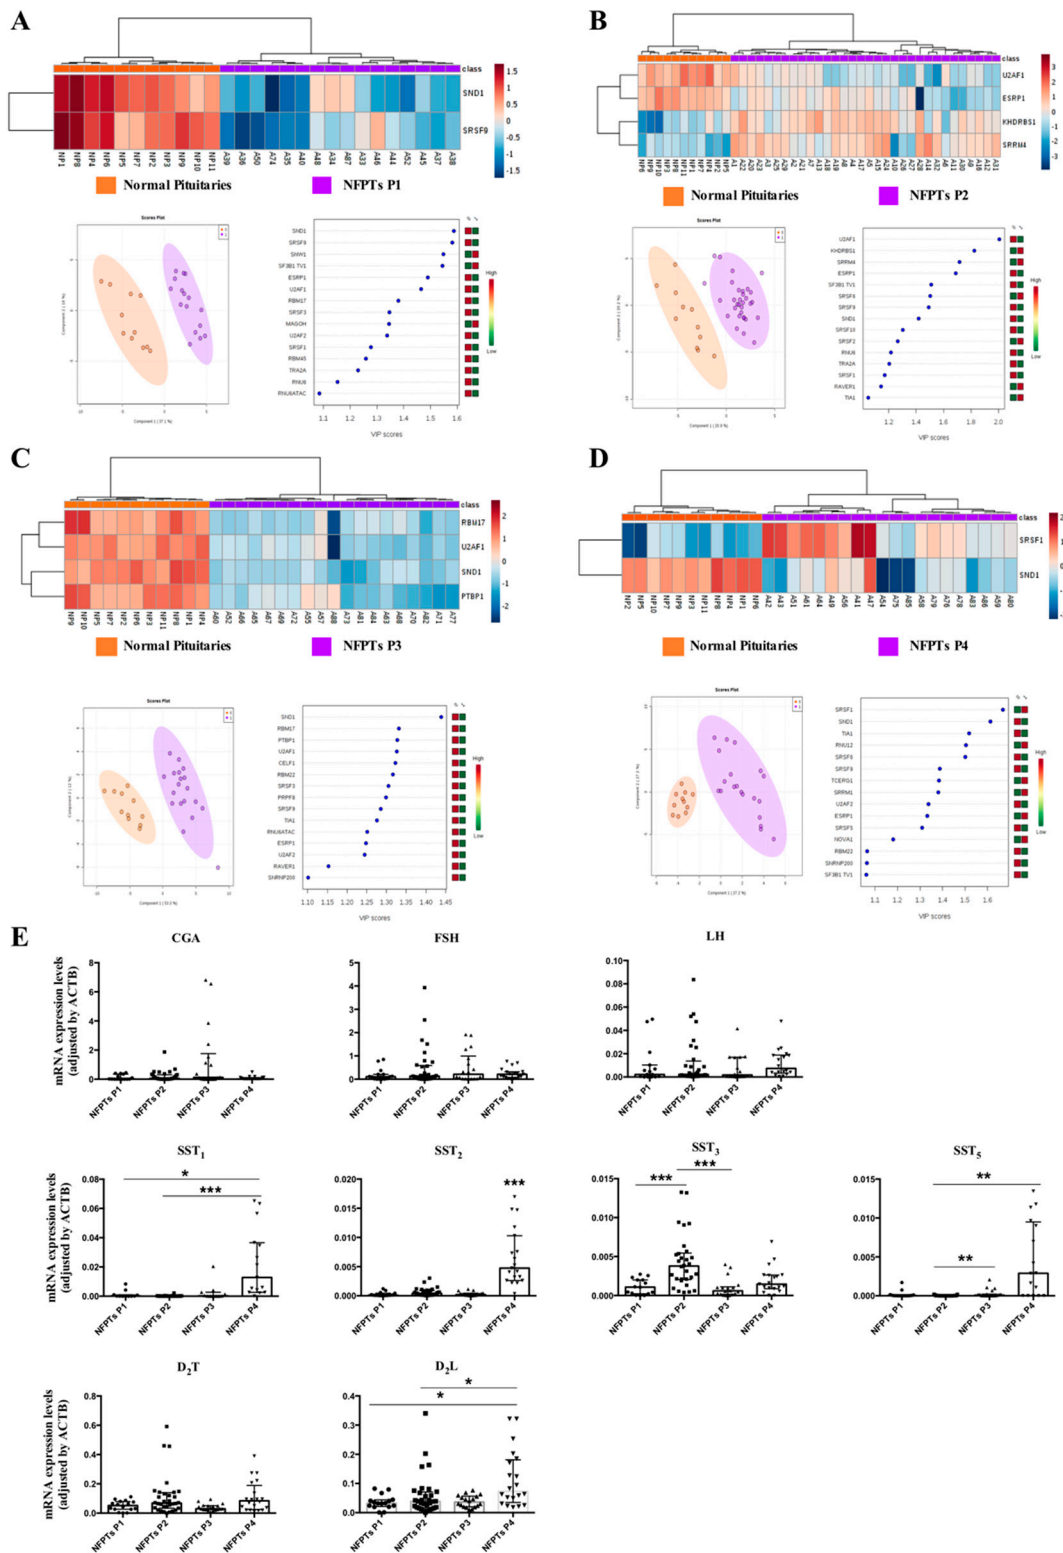

**Figure S3.** Non-functioning pituitary tumors (NFPTs). (A–D) Heatmaps of the splicing-regulatory elements with higher VIP score in the different populations of NFPTs (P1–P4) analyzed. Principal Components Analysis (PCA) of the mRNA expression levels of all the splicing-regulatory elements analyzed and VIP Scores top-feature of Partial Least Squares Discriminant Analysis (PLS-DA). (E) mRNA expression levels of classical hormones (CGA, FSH and LH) and somatostatin and dopamine receptors (SST<sub>1–5</sub> and D<sub>2</sub>) in the four populations of NFPTs observed in the first heatmap. Data represent median  $\pm$  interquartile range of absolute expression levels (copy number) of each transcript measured by qPCR and adjusted by  $\beta$ -actin (ACTB). Asterisks (\*  $p < 0.05$ , \*\*  $p < 0.01$ , \*\*\*  $p < 0.001$ ) indicate statistically significant differences between groups.

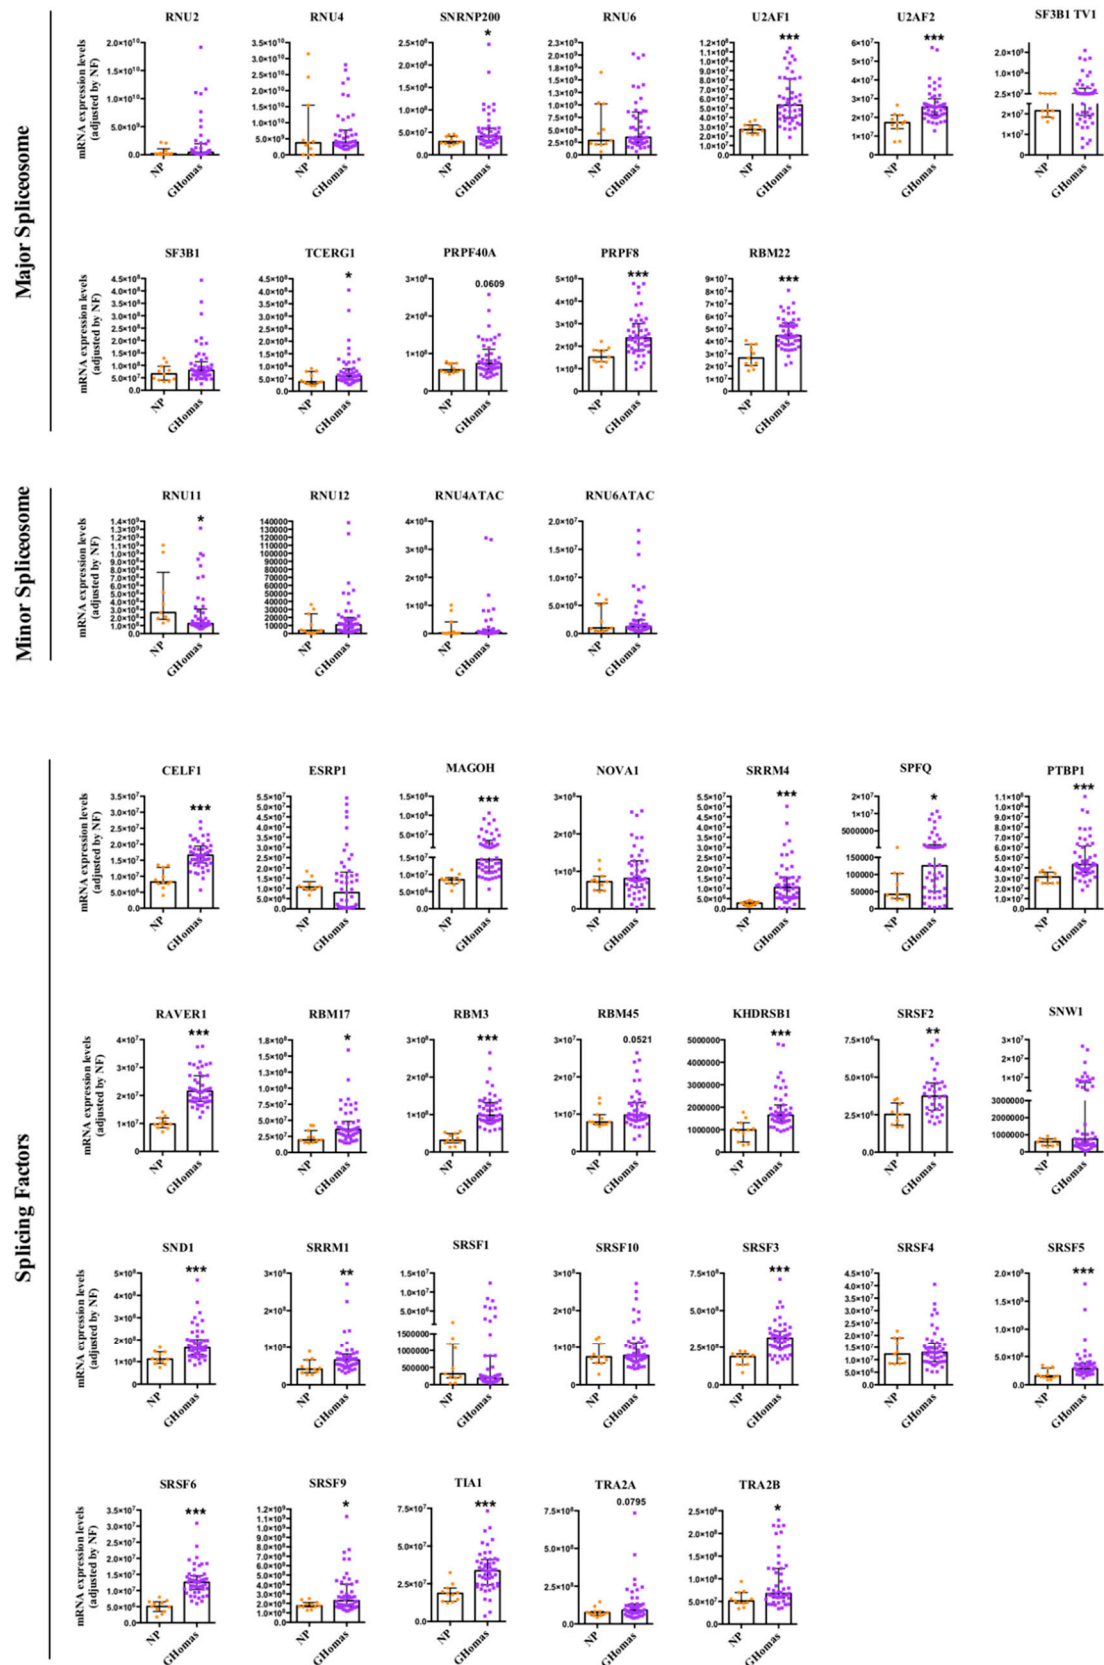

**Figure S4.** Somatotropinomas (GHomas). mRNA expression levels of all spliceosome components and splicing factors measured in GHomas compared to NPs using the qPCR array. Data represent median  $\pm$  interquartile range of absolute expression levels (copy number) of each transcript adjusted by a normalization factor. Asterisks (\*  $p < 0.05$ , \*\*  $p < 0.01$ , \*\*\*  $p < 0.001$ ) indicate statistically significant differences between groups.

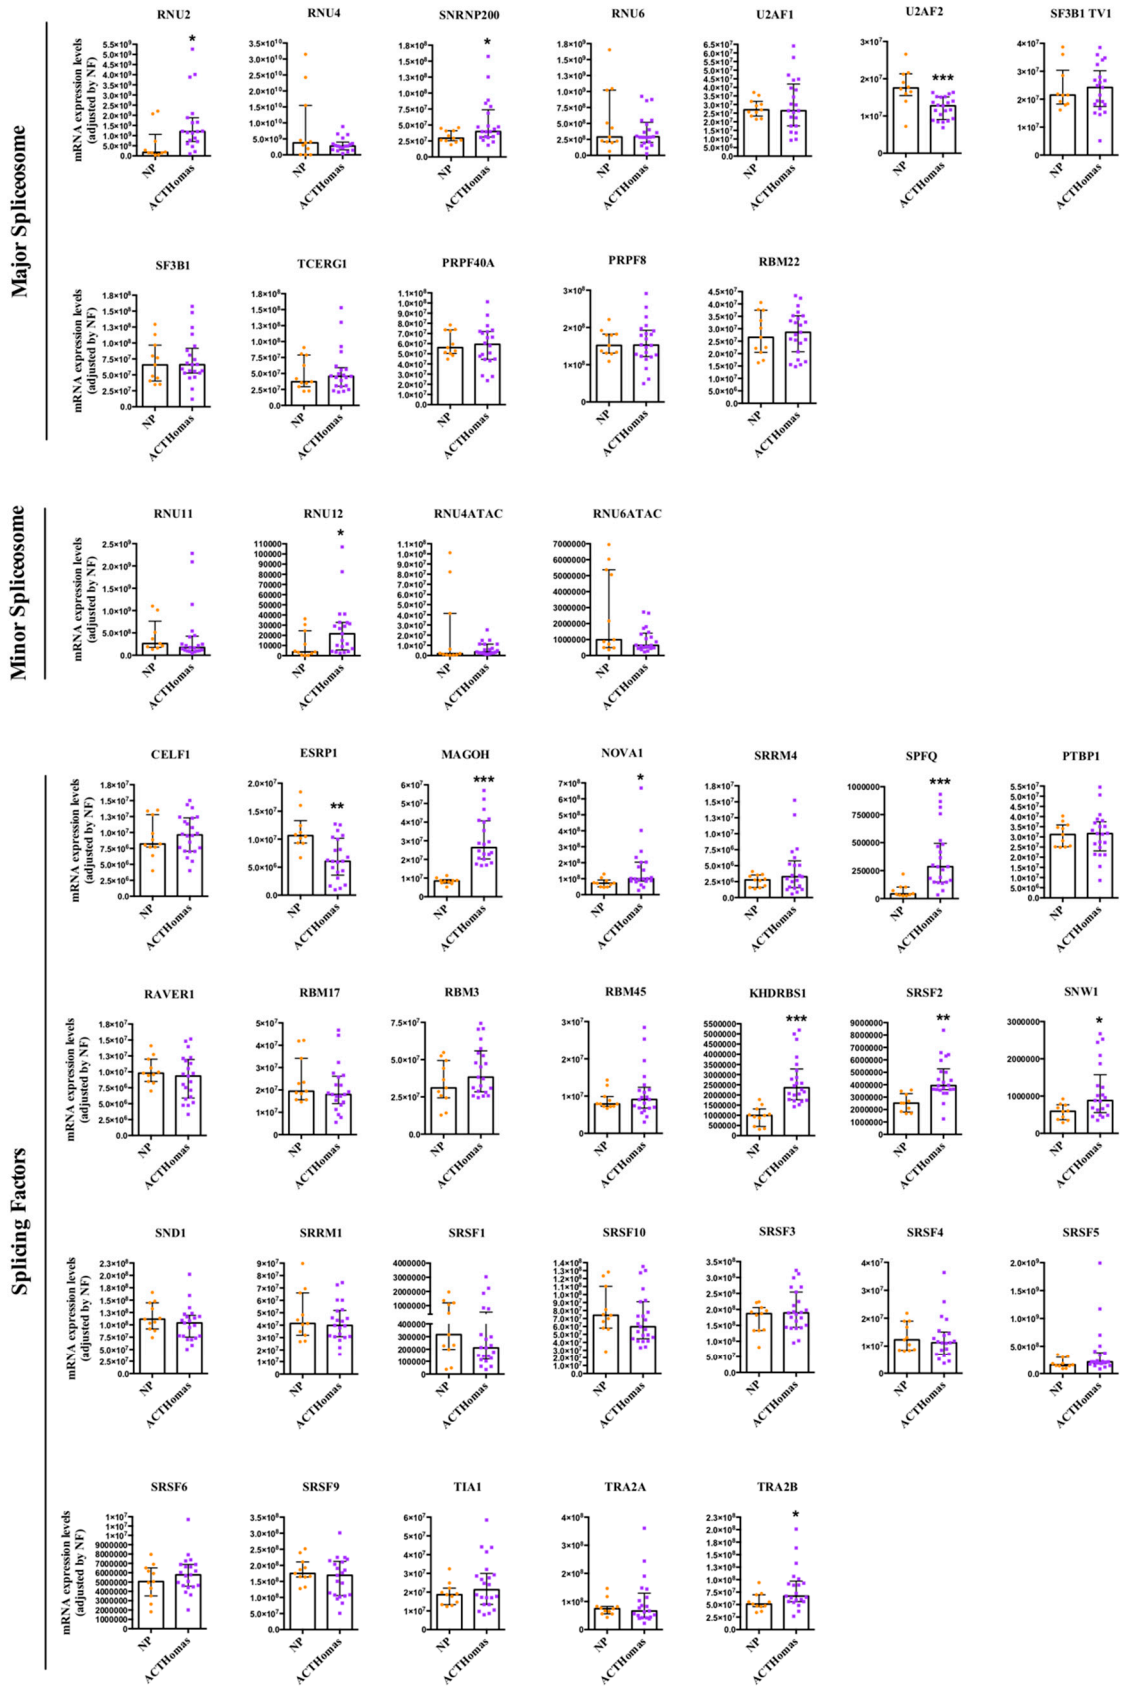

**Figure S5.** Corticotropinomas (ACTHomas). mRNA expression levels of all spliceosome components and splicing factors measured in ACTHomas compared to NPs using the qPCR array. Data represent median  $\pm$  interquartile range of absolute expression levels (copy number) of each transcript adjusted by a normalization factor. Asterisks (\*  $p < 0.05$ , \*\*  $p < 0.01$ , \*\*\*  $p < 0.001$ ) indicate statistically significant differences between groups.



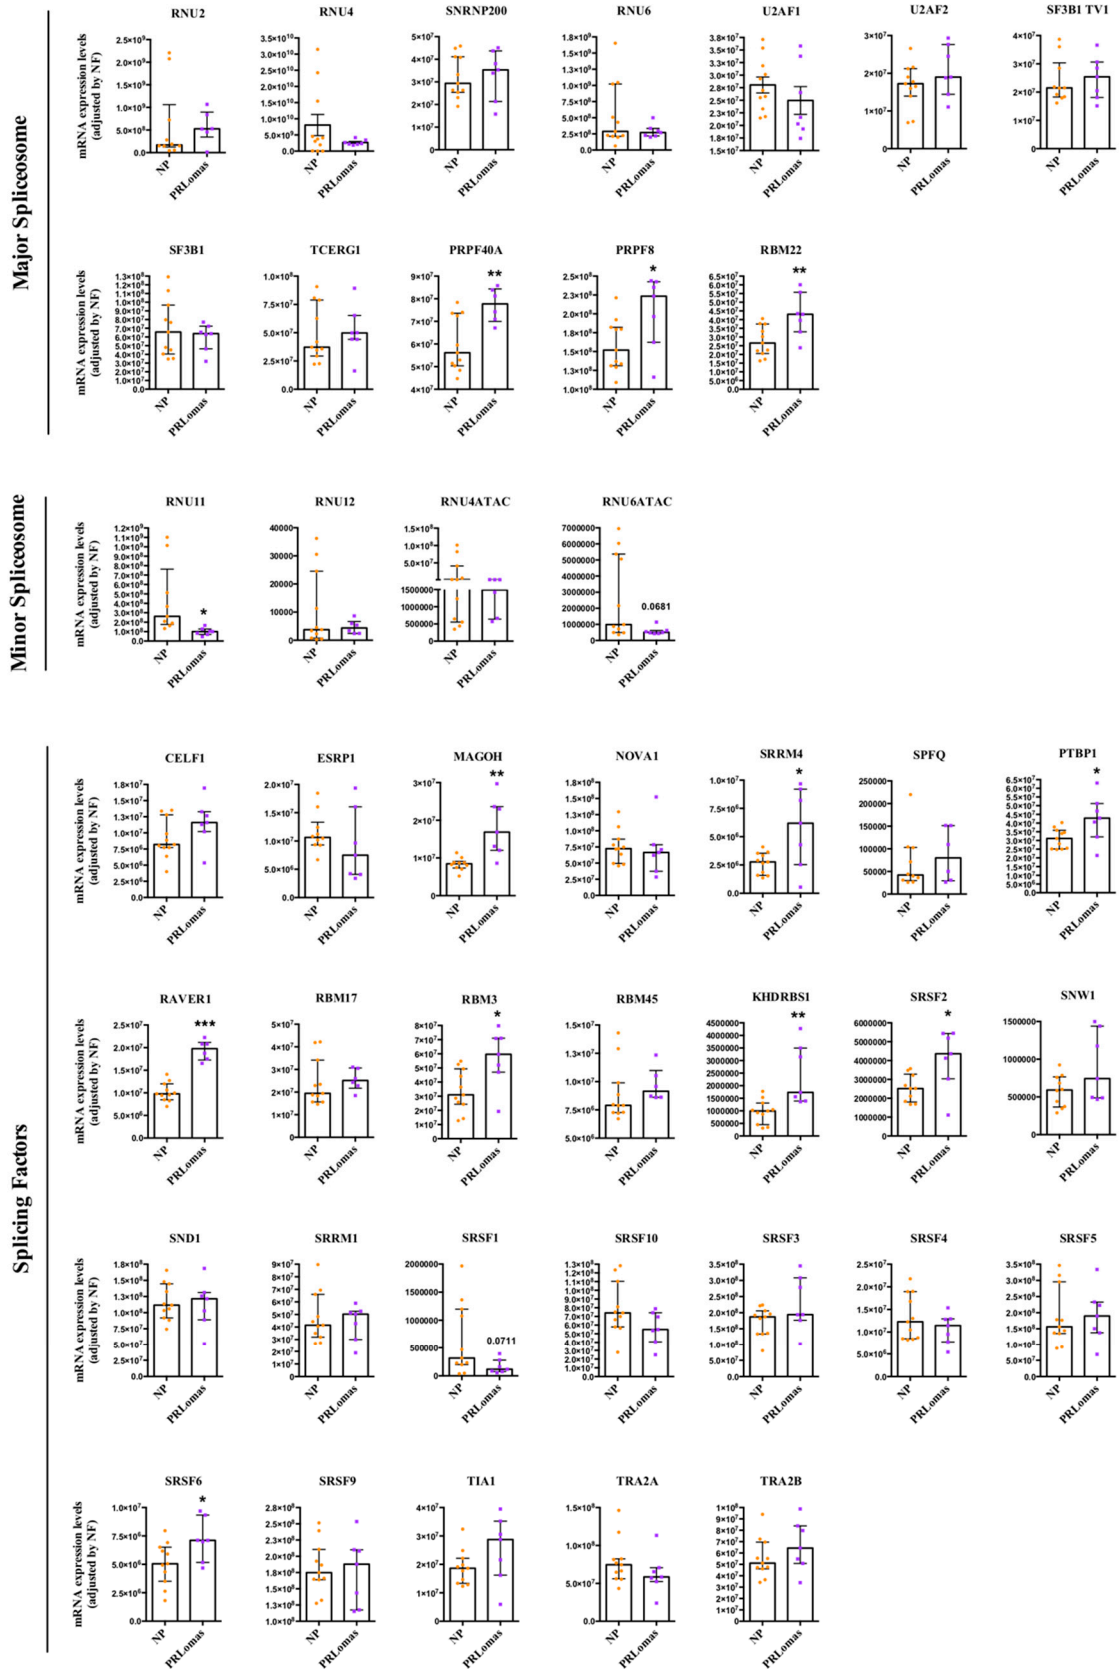

**Figure S6.** Prolactinomas (PRLomas). mRNA expression levels of all spliceosome components and splicing factors measured in PRLomas compared to NPs using the qPCR array. Data represent median  $\pm$  interquartile range of absolute expression levels (copy number) of each transcript adjusted by a normalization factor. Asterisks (\*  $p < 0.05$ , \*\*  $p < 0.01$ , \*\*\*  $p < 0.001$ ) indicate statistically significant differences between groups.

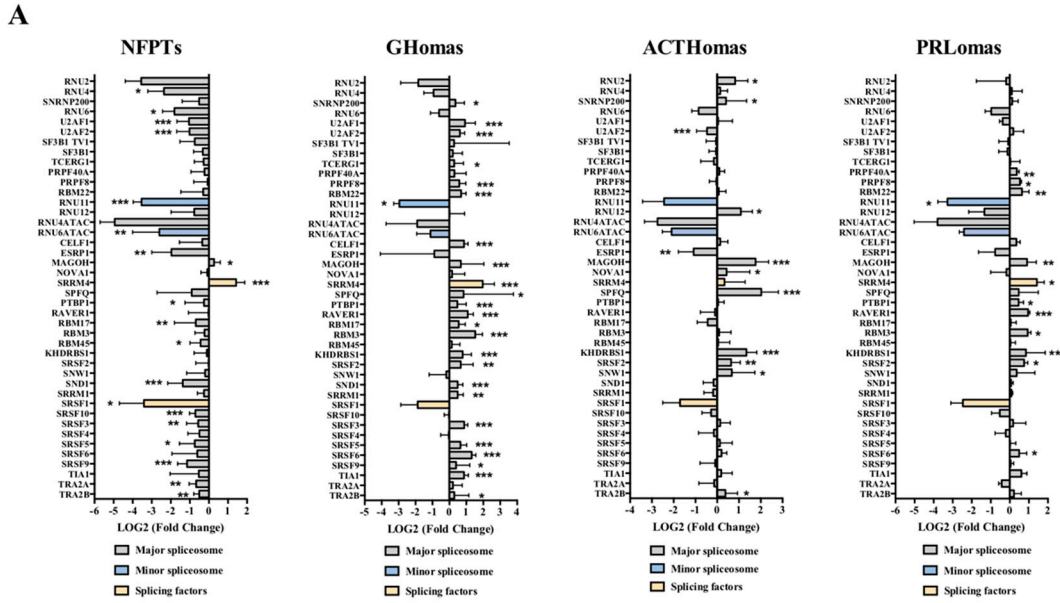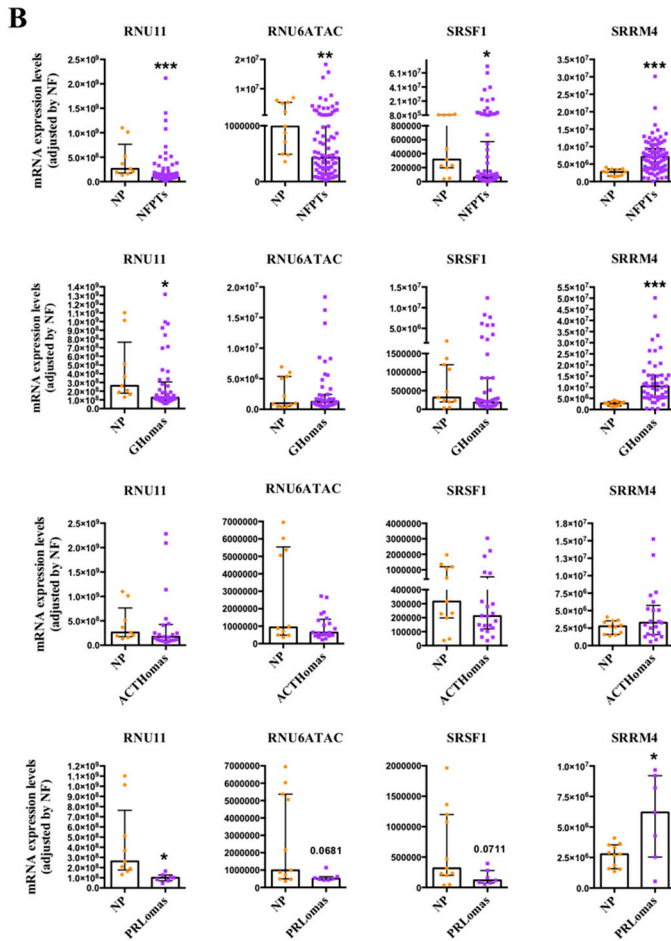

**Figure S7. (A)** Individual Fold-Change of spliceosome machinery expression levels showing the common dysregulated components (blue and yellow colors) in all PitNETs subtypes compared to NPs. **(B)** mRNA expression levels of spliceosome components and the splicing factor commonly dysregulated in NFPTs, GHomas, ACTHomas, and PRLomas, respectively. Data represent median  $\pm$  interquartile range of absolute expression levels (copy number) of each transcript adjusted by a normalization factor. Asterisks (\*  $p < 0.05$ , \*\*  $p < 0.01$ , \*\*\*  $p < 0.001$ ) indicate statistically significant differences between groups.

**Table S1.** Results from Chi-square test of clinical parameters between P1 and P2 of NFPTs derived from the second heatmap.

| Clinical Parameters      | Chi-Squared Test | <i>p</i> -value |
|--------------------------|------------------|-----------------|
| Sex                      | 0.141            | 0.707           |
| Cephalea                 | 2.462            | 0.292           |
| Visual alterations       | 0.201            | 0.904           |
| Extrasellar growth       | 1.377            | 0.241           |
| Cavernous sinus invasion | 0.575            | 0.448           |
| Chiasmatic compression   | 0.967            | 0.325           |
| Pre-surgery treatment    | 1.469            | 0.225           |
| Ki67 (<2% or ≥2%)        | 0.650            | 0.420           |
| Curation                 | 0.001            | 0.980           |

**Table S2.** Results from Chi-square test of clinical parameters between P1, P2, P3 and P4 of NFPTs derived from the first heatmap (cutting the dendrogram at second highest height).

| Clinical Parameters      | Chi-Squared Test | <i>p</i> -value |
|--------------------------|------------------|-----------------|
| Sex                      | 2.344            | 0.504           |
| Cephalea                 | 8.461            | 0.206           |
| Visual alterations       | 3.722            | 0.714           |
| Extrasellar growth       | 1.123            | 0.772           |
| Cavernous sinus invasion | 2.859            | 0.414           |
| Chiasmatic compression   | 0.240            | 0.971           |
| Pre-surgery treatment    | 4.104            | 0.250           |
| Ki67 (<2% or ≥2%)        | 0.436            | 0.933           |
| Curation                 | 1.796            | 0.616           |
